# Supplementary material for: Facile hydrothermal synthesis and electrochemical properties of orthorhombic LiMnO2cathode materials for rechargeable lithium batteries
Source: Royal Society of Chemistry journal article supplement (doi:10.1039/c3ra47932c), 2014-01-01
Supplement: c3ra47932c1.pdf [file c3ra47932c1.pdf]

## Supplementary Information

### Facile hydrothermal synthesis and electrochemical properties of orthorhombic $\text{LiMnO}_2$ cathode materials for rechargeable lithium batteries

Shulin Chen<sup>1</sup>, Feifei Cao<sup>2</sup>, Fan Liu<sup>1</sup>, Qianjun Xiang<sup>1</sup>, Xionghan Feng<sup>1</sup>, Lihu Liu<sup>1</sup>, Guohong Qiu<sup>\*,1</sup>

<sup>1</sup> College of Resources and Environment, Huazhong Agricultural University, Wuhan, 430070, P. R. China

<sup>2</sup> College of Sciences, Huazhong Agricultural University, Wuhan, 430070, P. R. China

\* Corresponding author: G.H. Qiu, qiugh@mail.hzau.edu.cn, Tel/Fax: +86(0)27 87280271

#### Figure captions

**Fig. S1.** XRD patterns of products synthesized in 0.1 mol L<sup>-1</sup> MnCl<sub>2</sub>, 0.6 mol L<sup>-1</sup> LiOH, 0.1 mol/L NaClO with (a) and without (b) EDTA (0.1 mol L<sup>-1</sup>) at 180 °C for 24 h.

**Fig. S2.** XRD patterns of the synthesized pure-phased and aluminum-doped *o*-LiMnO<sub>2</sub>: (a) M<sub>0</sub>, (b) M<sub>3</sub>, (c) M<sub>6</sub>, (d) M<sub>9</sub>, and (e) M<sub>12</sub>.

**Fig. S3.** Particle size distributions of M<sub>0</sub> (a), M<sub>m</sub> (b), M<sub>3</sub> (c), M<sub>6</sub> (d), M<sub>9</sub> (e) and M<sub>12</sub> (f).

**Fig. S4.** TEM images of M<sub>0</sub> (a), M<sub>3</sub> (b), M<sub>6</sub> (c), M<sub>9</sub> (d), M<sub>12</sub> (e).

**Fig. S5.** XRD patterns of products synthesized under different conditions: (a) 0.1 mol L<sup>-1</sup> MnCl<sub>2</sub>, 0.6 mol L<sup>-1</sup> LiOH, 0.1 mol L<sup>-1</sup> NaClO, 0.1 mol L<sup>-1</sup> EDTA, 180 °C, 24 h; (b) heat treatment of (a) in air at 300 °C for 2 h; (c) heat treatment of (a) in air at 600 °C for 2 h.

**Fig. S6.** Discharge specific capacities vs. cycle number with current density of 100 mA g<sup>-1</sup> for M<sub>0</sub>, M<sub>m</sub>, and M<sub>600</sub> after heat-treatment at 110 °C for 12 h.

## 1. The effect of EDTA on product composition

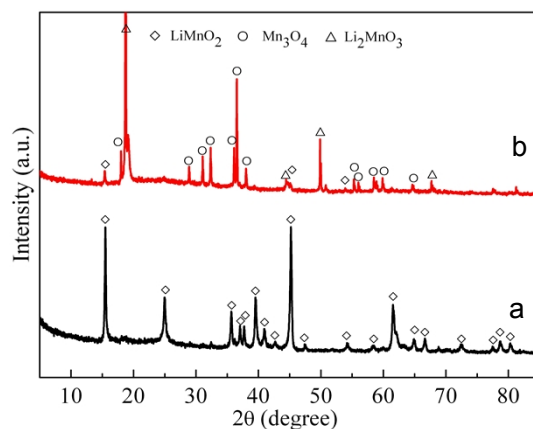

**Fig. S1.** XRD patterns of products synthesized in 0.1 mol  $\text{L}^{-1}$   $\text{MnCl}_2$ , 0.6 mol  $\text{L}^{-1}$   $\text{LiOH}$ , 0.1 mol/L  $\text{NaClO}$  with (a) and without (b) EDTA (0.1 mol  $\text{L}^{-1}$ ) at 180 °C for 24 h.

## 2. The preparation of Al doped $o$ -LiMnO<sub>2</sub>

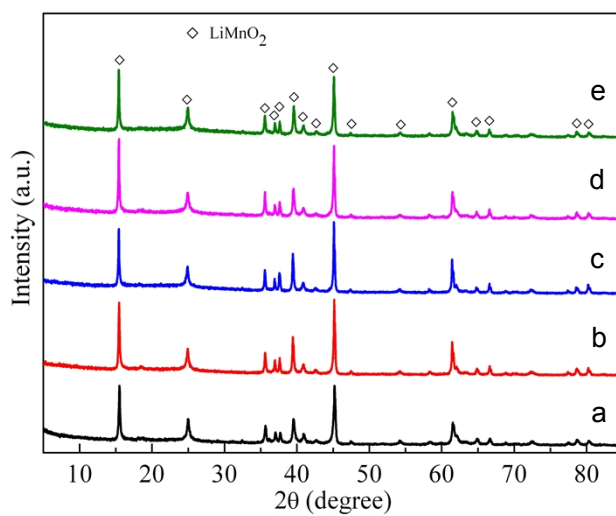

**Fig. S2.** XRD patterns of the synthesized pure-phased and aluminum-doped  $o$ -LiMnO<sub>2</sub>: (a) M<sub>0</sub>, (b) M<sub>3</sub>, (c) M<sub>6</sub>, (d) M<sub>9</sub>, and (e) M<sub>12</sub>.

## 3. The particle size distributions of the as-obtained samples

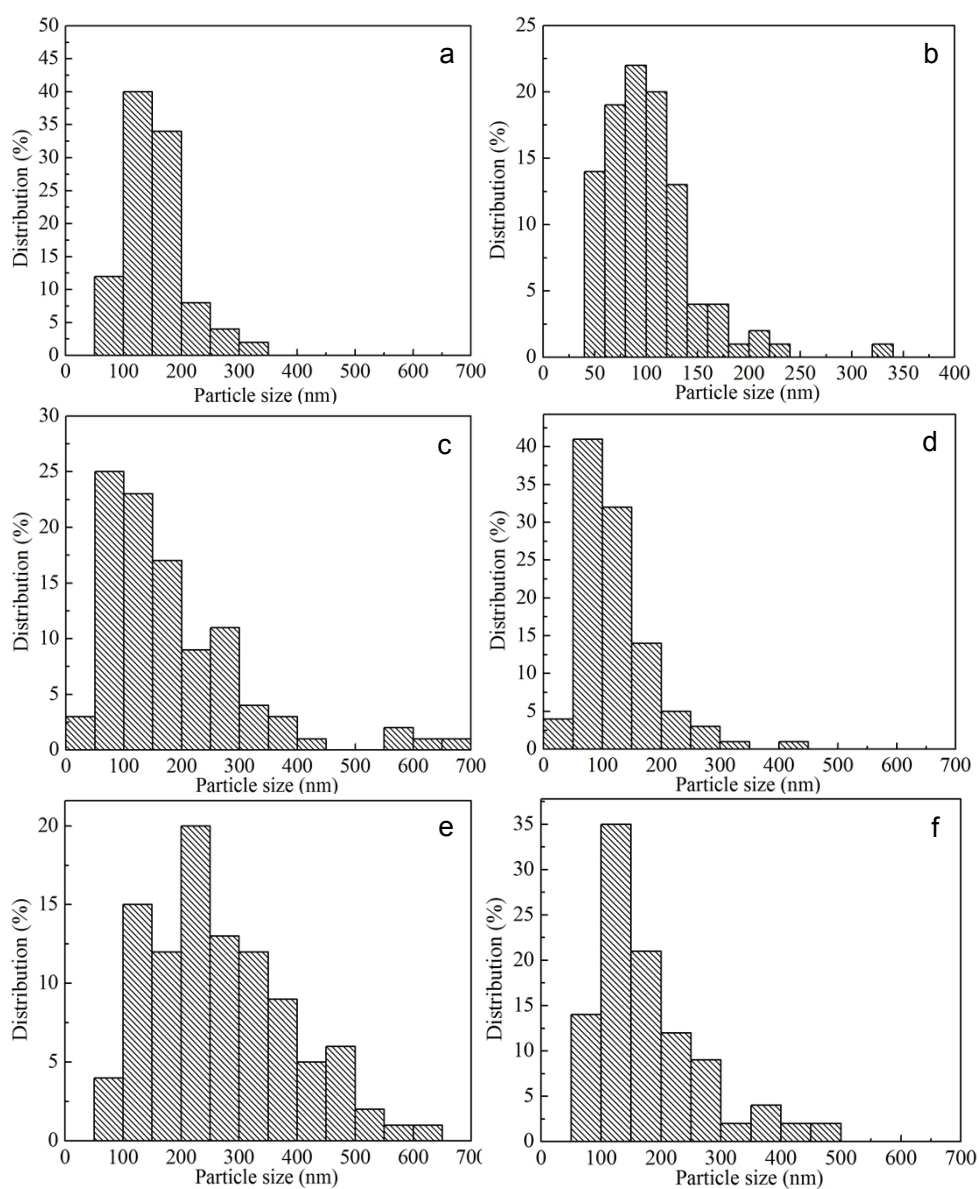

**Fig. S3.** Particle size distributions of M<sub>0</sub> (a), M<sub>m</sub> (b), M<sub>3</sub> (c), M<sub>6</sub> (d), M<sub>9</sub> (e) and M<sub>12</sub> (f).

#### 4. The micromorphology and particle size of pure and Al doped *o*-LiMnO<sub>2</sub>

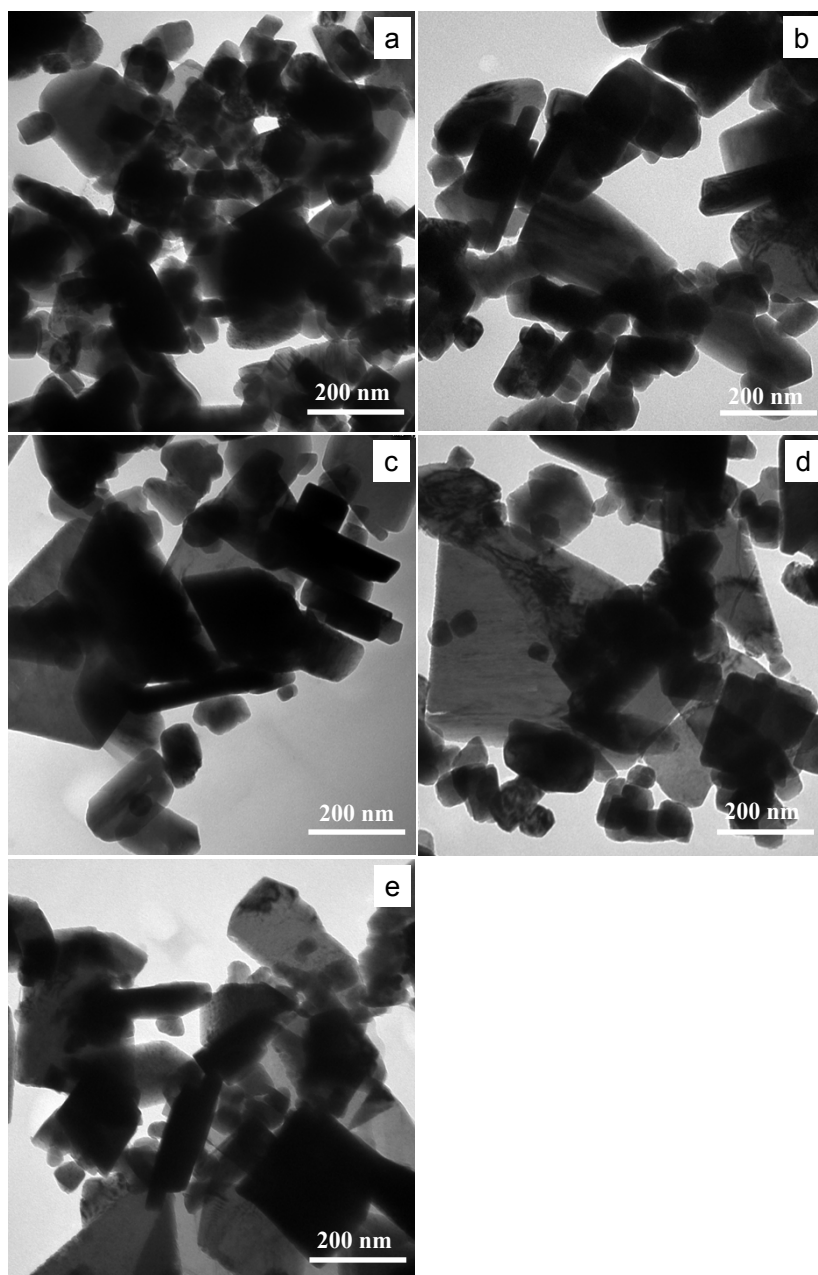

**Fig. S4.** TEM images of  $M_0$  (a),  $M_3$  (b),  $M_6$  (c),  $M_9$  (d),  $M_{12}$  (e).

## 5. The heat treatment of as-obtained $\alpha$ -LiMnO<sub>2</sub> in air

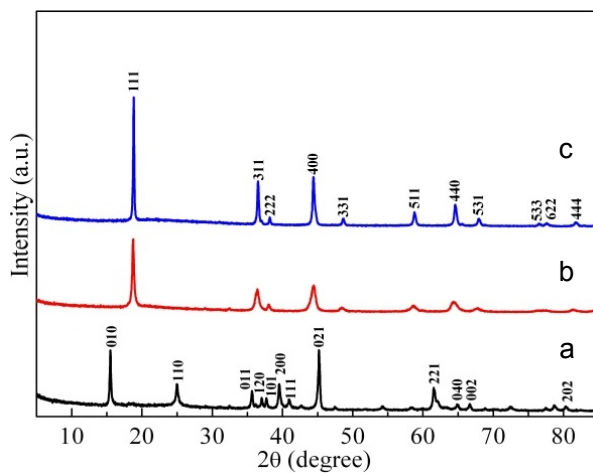

**Fig. S5.** XRD patterns of products synthesized under different conditions: (a) 0.1 mol L<sup>-1</sup> MnCl<sub>2</sub>, 0.6 mol L<sup>-1</sup> LiOH, 0.1 mol L<sup>-1</sup> NaClO, 0.1 mol L<sup>-1</sup> EDTA, 180 °C, 24 h; (b) heat treatment of (a) in air at 300 °C for 2 h; (c) heat treatment of (a) in air at 600 °C for 2 h.

## 6. The electrochemical performance of the as-obtained $\rho$ -LiMnO<sub>2</sub> and LiMn<sub>2</sub>O<sub>4</sub>

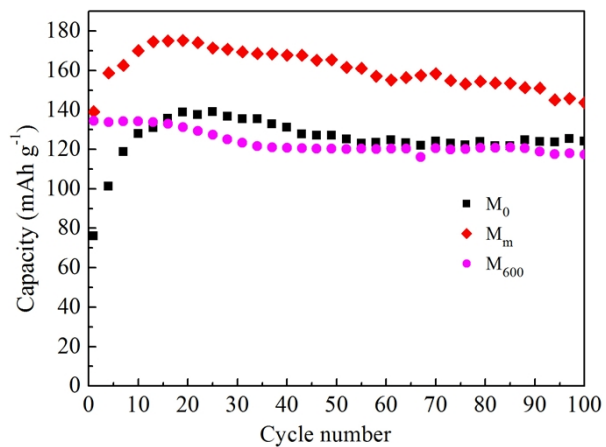

**Fig. S6.** Discharge specific capacities vs. cycle number with current density of 100 mA g<sup>-1</sup> for  $M_0$ ,  $M_m$ , and  $M_{600}$  after heat-treatment at 110 °C for 12 h.
